1 Dynamic changes in innate immune and T cell function and composition at the nasal  
2 mucosa across the human lifespan

3 Jesús Reiné<sup>1</sup>, Beatriz F. Carniel<sup>1</sup>, Carla Solórzano<sup>1</sup>, Elena Mitsi<sup>1</sup>, Sherin Pojar<sup>1</sup>, Elissavet  
4 Nikolaou<sup>1</sup>, Esther L. German<sup>1</sup>, Angela D. Hyder-Wright<sup>1,2</sup>, Helen Hill<sup>1,2</sup>, Caz Hales<sup>1,2</sup>,  
5 Lynsey Brown<sup>3</sup>, Victoria Horsley<sup>3</sup>, Lisa Hughes<sup>3</sup>, Seher Zaidi<sup>1</sup>, Victoria Connor<sup>1,2</sup>, Ben  
6 Morton<sup>1,4</sup>, Andrea M. Collins<sup>1,2,4</sup>, Jamie Rylance<sup>1</sup>, Hugh Adler<sup>1</sup>, Paul S. McNamara<sup>3</sup>,  
7 Daniela M. Ferreira<sup>1,6</sup>, Simon P. Jochems<sup>1,5,6\*</sup>

8 <sup>1</sup> Department of Clinical Sciences, Liverpool School of Tropical Medicine, Pembroke Place  
9 L35QA, Liverpool, United Kingdom

10 <sup>2</sup> Royal Liverpool and Broadgreen University Hospital, Prescott Street, L78XP, Liverpool,  
11 United Kingdom

12 <sup>3</sup> Institute in the Park, Alder Hey Children's Hospital, Prescott Rd, L14 5AB, Liverpool,  
13 United Kingdom

14 <sup>4</sup> Aintree University Hospital NHS Foundation Trust, Lower Ln, L9 7AL Liverpool, United  
15 Kingdom

16 <sup>5</sup> Department of Parasitology, Leiden University Medical Center, Albinusdreef 2, 2333  
17 ZA Leiden, Netherlands.

18 <sup>6</sup> Joint senior authors

19 **\*Corresponding author:**

20 Simon P. Jochems. Leiden University Medical Center, Albinusdreef 2, Leiden,  
21 Netherlands. Tel: +31 (0)71 526 1404. Email: [s.p.jochems@lumc.nl](mailto:s.p.jochems@lumc.nl)

- 22 **Keywords:** Mucosal immunology, aging, elderly, paediatric, infection, *Streptococcus*
- 23 *pneumoniae*, T cells, neutrophils, monocytes, respiratory tract

24 **Abstract**

25 The very young and very old are at increased risk of serious infections, including  
26 pneumonia. This may relate to changes in the immune system as young children have  
27 limited immunological memory, while immunosenescence, inflammaging and a decreased  
28 pool of naïve immune cells are described with advanced age. How the immune system  
29 changes with age at mucosal surfaces, from where infections frequently develop, is not  
30 very clear as access to human tissue samples is limited. Therefore, we aimed to assess  
31 the composition and activation state of the immune system at the human mucosa. Here,  
32 we profiled nasal immune cells from 207 individuals between 1 to 80 years old using flow  
33 cytometry. Neutrophil and monocyte functionality were measured using whole blood  
34 assays. Levels of thirty nasal cytokines were measured from nasal lining fluid.  
35 Nasopharyngeal colonization by *Streptococcus pneumoniae* was assessed using  
36 classical microbiology and associated with immune responses. We found that young  
37 children have a striking paucity of granulocytes at the nasal mucosa compared to adults.  
38 In addition, T cell numbers at the nasal mucosa decreased progressively with age and  
39 were almost absent in older adults. While nasopharyngeal colonization by *Streptococcus*  
40 *pneumoniae* was associated with elevated levels of inflammation it had a limited effect on  
41 nasal immune composition, including levels of monocytes and neutrophils. These results  
42 show that the immune system at the nasal mucosal surface changes drastically with age  
43 and provides explanations for the increased susceptibility to infections in young and old  
44 age.

45 **Significance statement**

46 How the immune system changes with age is an intensive area of research, but has been  
47 primarily studied in blood. However, blood poorly reflects the immune system at the  
48 mucosa, from where infections develop. This manuscript provides a first characterization  
49 of how the composition and function of the immune system in the upper respiratory tract  
50 changes with age, providing explanations for increased susceptibility to infection in the  
51 very young and old. Furthermore, by linking mucosal and systemic measurements with  
52 pneumococcal colonization, we observed that reduced monocyte and neutrophil  
53 responses associate with the increased burden of pneumococcal colonization in children.  
54 This study highlights the need to study the immune system also at other mucosal sites in  
55 the context of aging.

56 **Abbreviations:**

57 Spn; *Streptococcus pneumoniae*

58 MPO; Myeloperoxidase

59 LPS; Lipopolysaccharide

60

61

## 62 **Introduction**

63 Pneumonia is the most common infectious cause of death in children under 5 worldwide  
64 (1). Individuals with advanced age are also at progressively increasing risk of acquiring  
65 pneumonia (2, 3). Over the next two decades, the incidence of community-acquired  
66 pneumonia is expected to double in the United States as the population ages (4). How  
67 alterations in the mucosal immune system with age predispose to infections in the very  
68 young and very old remains unclear as access to samples is limited. While many studies  
69 have investigated how the immune system changes with age, most of these have been  
70 conducted in blood, which poorly reflects the immune system at mucosal surfaces (5, 6).  
71 Nonetheless, studies from blood and secondary lymphoid tissues have revealed  
72 alterations in cell numbers in blood of young children and reduced immunological memory  
73 in children, while increased inflammation, immunosenescence and reduced naïve  
74 memory pools have been described with advanced age (5, 7-10). Interestingly, mouse  
75 models have suggested that the mucosal immune system might age more rapidly than  
76 the systemic compartment (11) .

77 *Streptococcus pneumoniae* (Spn) is the most common bacterial cause of pneumonia, but  
78 usually colonizes the nasopharynx in absence of disease, with colonization frequency  
79 decreasing with age (12, 13). Thus, a seeming paradox exists in individuals with advanced  
80 age who are at increased risk of pneumococcal disease, but are rarely colonized. On the  
81 other hand, children are frequently colonized and infected and are thus the main reservoir  
82 for pneumococcal transmission. Mathematical modelling has suggested that the gradual  
83 development of adaptive immunity leads to reduced colonization rates with advanced age  
84 (14). Mouse models have suggested that Spn colonization is controlled by Th17 cells at

85 the nasal mucosa (15, 16). Using an experimental human pneumococcal challenge  
86 model, we recently demonstrated that Spn colonization control in healthy young adults  
87 was associated with responses of nasal-resident granulocytes and monocyte recruitment  
88 (17, 18).

89 Here, we aimed to investigate whether immune cell composition at the nasal mucosa are  
90 altered in young children and older adults compared to young adults, which could underlie  
91 there differential susceptibility to respiratory tract infections. Therefore, we collected  
92 minimally-invasive nasal microbiopsies from 207 individuals between 1 to 80 years old  
93 and immunophenotyped immune cells using flow cytometry (19). We also investigated  
94 circulating innate immune cell function and phenotype and correlated these with mucosal  
95 findings. Finally, we investigated the effect of Spn colonization on nasal inflammation by  
96 collecting nasal lining fluid and its effect on immune cell composition and activation (20).

97

98

99

100

101

102

103

104

105

106 **Results**

107 **Composition and activation of nasal immune cells changes with age**

108 Here, we phenotyped nasal cells collected using minimally-invasive nasal microbiopsies  
109 (Figure 1). Individuals were grouped as children (1-5 years old, n=43), young adults (18-  
110 49 years old, n=121) or older adults (50-80 years old, n=43, Table 1). Samples from  
111 children were obtained during planned procedures under general anaesthesia such as  
112 dental extractions, while adults were awake for sample collection.

113 Nasal cell populations exhibited a significant shift with age (Figure 1A). The capacity to  
114 maximally discriminate groups occurred at an age cut-off between young and older adults  
115 at 50 years (see Figure S1 in the SI Appendix). Levels of granulocytes were 6.7x and 7.4x  
116 lower in children than in young adults and older adults, respectively (Figure 1B).  
117 Conversely, nasal T cell levels were 16.1x and 8.1x lower in older adults than in children  
118 or young adults, respectively (Figure 1C). As a proportion of nasal immune cells,  
119 neutrophils increased, and T cells decreased with age (Figure 1D, E). Monocytes were  
120 rare at the nasal mucosa and did not change in frequency with age (Figure 1F). Among T  
121 cells, CD8<sup>+</sup> T cells were the most abundant subset in all age groups (Figure 1G). CD4<sup>-</sup>  
122 CD8<sup>-</sup> T cell numbers and CD8<sup>+</sup> T cell numbers were 4.8x and 2.0x increased in children  
123 compared to young adults, respectively (see Figure S2 in the SI Appendix). CD4<sup>+</sup> T cell  
124 numbers were similar between children and young adults and CD4<sup>+</sup> T cells thus increased  
125 in frequency among T cells in adults (Figure 1G and see Figure S2 in the SI Appendix).  
126 In children, granulocytes were fewer, but exhibited higher expression of CD66b, a marker  
127 of degranulation, than in adults (Figure 1H) (21). T cell activation status was also affected

128 by age, with young adults showing increased levels of human leukocyte antigen – DR  
129 isotype (HLA-DR)<sup>+</sup> T cells compared to children and older adults (Figure 1I).

130 **Circulating monocytes from young children have reduced CCL2 production upon**  
131 ***Streptococcus pneumoniae* stimulation**

132 We then investigated how innate immune function was affected by age. As the numbers  
133 of nasal cells collected using currettes precluded the conduction of functional assays,  
134 blood was used. To measure monocyte function, we stimulated whole blood from 43  
135 individuals for 4 hours with heat-killed Spn and assessed production of C-C motif  
136 chemokine ligand 2 (CCL2), interleukin-10 (IL-10), IL-6 and tumor necrosis factor alpha  
137 (TNF) (see Figure S3 in the SI Appendix). Monocytes from children displayed impaired  
138 production of CCL2 upon stimulation compared to adults, while production of IL-6 and  
139 TNF was similar (Figure 2A). Little or no of the anti-inflammatory cytokine IL-10 was  
140 induced, demonstrating a pro-inflammatory response of blood monocytes upon Spn  
141 stimulation.

142 **Blood neutrophils change functionally and phenotypically with age**

143 Neutrophil phagocytic and oxidative capacities were measured using a whole blood  
144 reporter bead assay (see Figure S4 in the SI Appendix) (22). In parallel, neutrophils were  
145 immunophenotyped using a panel of ten maturation and activation markers (see Figure  
146 S4 in the SI Appendix). Neutrophils of older adults displayed increased uptake and  
147 oxidation, while no significant differences were present between neutrophils of children  
148 and young adults (Figure 2B). The oxidative capacity of neutrophils positively correlated  
149 with expression of the activation and maturation markers CD10, CD11b, CD11c and



150 CD66b (Figure 2C). In addition, neutrophil surface levels of CD10, CD11b and CD33, but  
151 not CD11c and CD66b, were significantly increased in older adults compared to children  
152 (Figure 2D). Blood neutrophils in young adults had increased expression of CD62L  
153 compared to children and older adults and increased expression of CD15 and CD16  
154 compared to children and older adults, respectively. To compare blood and mucosal  
155 neutrophils, paired neutrophils were phenotyped for 13 individuals (Figure 2E). Nasal  
156 neutrophils had increased surface expression of CD10, CD11b, CD11c, CD54 and  
157 CD66b, while CD62L and CD16 expression were lost. Neutrophils at the nasal mucosa  
158 thus exhibit an activated phenotype as previously described for neutrophils in  
159 bronchoalveolar fluid (23). Of all markers, only CD10 ( $r=0.64$ ) and CD33 ( $r=0.92$ )  
160 positively correlated between the two compartments, indicating that blood neutrophil  
161 phenotype does not accurately reflect mucosal neutrophil phenotype on an individual level  
162 (Figure 2F).

### 163 ***Streptococcus pneumoniae* colonization causes inflammation in children**

164 Finally, we investigated how colonization with Spn affects nasal immune populations and  
165 responses by measuring levels of thirty cytokines and chemokines in nasal lining fluid  
166 collected from adults ( $n=37$ , none colonized by Spn) or children ( $n=49$ , 22 of whom  
167 colonized by Spn). Cytokine levels were similar between adults and children not colonized  
168 with Spn, but different in children colonized with Spn (Figure 3A). Levels of granulocyte-  
169 colony stimulating factor (G-CSF), IL-15, IL-6, CCL3, basic fibroblast growth factor (FGF-  
170 basic), IL-17A, IL-10, CCL5, TNF and IL-5 were significantly elevated in colonized children  
171 compared to adults (Figure 3B). Among these, CCL3 and IL-6 showed a positive  
172 association with pneumococcal load (Figure 3C). G-CSF was the only protein also

173 increased in non-colonized children compared to adults. Interleukin-1 receptor antagonist  
174 (IL-1RA) and IL-13 were decreased in both colonized and non-colonized children  
175 compared to adults, while IL-7 was lower in only non-colonized children compared to  
176 adults. There were no significant differences between colonized and non-colonized  
177 children, but these groups showed a relatively large inter-individual variation compared to  
178 adults. This is in accordance with previous findings that the gut microbiome shows greater  
179 variation in young children than in adults (24). Subsequently, we assessed neutrophil  
180 degranulation by measuring nasal levels of myeloperoxidase (MPO), which were  
181 increased in both non-colonized (1.5x,  $p = 0.02$ ) and colonized (4.6x,  $p = 0.0005$ ) children  
182 compared to adults (Figure 3D) (25). However, levels of MPO were not significantly  
183 affected by Spn colonization status or load in children (Figure 3D, E). Nonetheless, the  
184 increased levels of MPO in children compared to adults confirms the increased expression  
185 of CD66b on nasal granulocytes in children. Indeed, MPO levels correlated on an  
186 individual level with granulocyte activation but not granulocyte numbers (Figure 3F, G).

187 ***Streptococcus pneumoniae* colonization is not associated with altered nasal**  
188 **immune cells in children**

189 Despite the increased cytokine production during Spn colonization, no clear differences  
190 in immune cell levels were apparent between colonized and non-colonized children  
191 (Figure 4A-C). Monocytes, which are recruited to the nose of adults experimentally  
192 colonized with pneumococcus, were not affected by Spn colonization (Figure 4D) (17).  
193 While Spn colonization was not associated with neutrophil activation levels, T cell  
194 activation was increased in Spn-colonized children compared to non-colonized children  
195 (29.3% versus 18.1% of HLA-DR<sup>+</sup> T cells, Figure 4E, F).

## 196 **Discussion**

197 Here, we investigated how the composition of immune cells at the nasal mucosa is altered  
198 with age, with only young adults having an immune profile with an abundance of both  
199 granulocytes and T cells. Granulocytes were depleted in children, while there was a  
200 paucity of T cells in older adults.

201 As neutrophils have a critical concentration threshold for effective bacterial killing, it is  
202 possible the reduced number of nasal granulocytes is associated with the increased  
203 susceptibility of children to respiratory tract colonization and infections (26). The reduced  
204 expression of the adhesion molecules CD62L, CD11b and CD15, which are important for  
205 extravasation and trafficking to tissues (27), on blood neutrophils from children could  
206 explain their limited numbers at the nasal mucosa. Nasal IL-8 levels, which is important  
207 for neutrophil migration, were not different between adults and children. We did not,  
208 however, investigate expression of chemokine receptors as CXCR1 and 2, the receptors  
209 for IL-8, on circulating neutrophils and it cannot be excluded that differences in surface  
210 expression of these markers exist between children and adults (28).

211 Despite having reduced numbers of nasal granulocytes, the granulocytes in children were  
212 activated to a higher degree than in young adults, as shown by increased levels of CD66b  
213 expression and increased levels of MPO. Possible explanations for this include a different  
214 effect of migration into tissues, which can activate neutrophils *per se*, and altered  
215 activation by microbiota in children compared to adults. Indeed, surface marker  
216 expression between blood and nasal neutrophils correlated poorly on an individual level,  
217 with the exception of CD10 and CD33. This highlights that the study of immune cells in  
218 the circulation potentially does not reflect the same cell type at mucosal sites.

219 Circulating neutrophil responses using the bead reporter assay were increased in older  
220 adults compared to younger adults, in agreement with previous reports on neutrophils  
221 from elderly individuals (29). Our observations also corroborate findings from mouse  
222 models where aged neutrophils show an increased phagocytic capacity compared to non-  
223 aged neutrophils, which was associated with elevated expression of CD11b (27). In  
224 contrast, previous studies have shown that the antibody-mediated opsonophagocytic  
225 capacity of neutrophils is reduced in the elderly with reduced observed responses to  
226 *Staphylococcus aureus*, but not *Escherichia coli* (30, 31).

227 We observed that T cell levels were reduced in older adults, which was already apparent  
228 around the age of 50, before the increased susceptibility to infections becomes apparent.  
229 As tissue-resident memory T cells are crucial for protection against infections at mucosal  
230 surfaces, this lack of mucosal T cells could provide an explanation for the increased  
231 susceptibility to respiratory infections in the elderly (32). Although vaccine efficacy drops  
232 with advanced age (33), the development of vaccines that increase tissue-resident  
233 memory T cells might thus be particularly beneficial for the elderly. In that light it would be  
234 interesting to further characterize these T cells at the mucosa to investigate which specific  
235 cells are lost, although this would require access to large tissue samples such as biopsies.  
236 Spn colonization led to increased nasal inflammation in children, in contrast to what we  
237 previously observed in experimentally colonized adults (17). This could explain the  
238 increased transmission potential of children, as inflammation was shown to augment  
239 transmission in murine models (34). Although the molecular mechanisms that associate  
240 with increased inflammation upon colonization in children remain unclear, it is likely not  
241 uniquely due to higher pneumococcal density in children as many cytokines only poorly

242 correlated with Spn density. It is not impossible that the concurrent presence of other  
243 bacterial and viral factor was associated inflammation but also predisposing to Spn  
244 colonization.

245 Spn colonization had limited effect on the nasal immune cell composition or activation  
246 status in children, with the exception of HLA-DR expression on T cells. This corroborates  
247 the observed increase in nasal levels of prototypic T cell cytokines as IL-17A, IL-5, IL-10  
248 and CCL-5 in colonized children. Levels of MPO and CD66b expression on neutrophils  
249 were not affected by Spn colonization in children. This is in contrast with young adults  
250 experimentally inoculated by Spn, who show an increase in MPO levels following  
251 colonization (17). Possible explanations for this discrepancy are the reduced total number  
252 of granulocytes in children, an increased baseline neutrophil activation in non-colonized  
253 children compared to adults, or presence of low numbers of Spn that are not detected by  
254 classical microbiology but could still activate neutrophils.

255 In addition, Spn colonization in children was not associated with increased levels of  
256 monocytes, which are important for Spn clearance (17, 35). Indeed, nasal CCL2 levels,  
257 which mediates monocyte recruitment (17, 35), were not increased in colonized children.  
258 Interestingly, blood monocytes from children showed an impaired production of CCL2  
259 upon Spn stimulation. This was specific as production of TNF and IL-6 was not affected.  
260 Previously it was shown that infant mice also have a limited monocyte recruitment  
261 following Spn colonization, leading to an inability to clear Spn colonization, although this  
262 was associated with microbiota-driven increased baseline CCL2 levels (36).

263 In contrast to our findings, in one previous study in which nasal aspirates were collected  
264 in children with acute otitis media, upper respiratory infections or without infection,

265 recruitment of neutrophils to the nasopharynx correlated with Spn density (37). However,  
266 the previous study used qPCR for the genes *CD16*, *CD18* and *CD62L* on nasal aspirate  
267 pellets to quantify neutrophils, which might not as accurately measure neutrophil counts  
268 as flow cytometry, since qPCR reflects both the cellular composition and gene expression  
269 levels of individual cells. Moreover, the previous study found increased neutrophil count  
270 especially during otitis media, which also associated with increased Spn density, while we  
271 studied immune composition in the absence of infection.

272 One previously postulated explanation for the increased susceptibility to Spn colonization  
273 in children is an increased Treg/Th17 ratio in children compared to adults (38, 39).  
274 However, IL-17A levels were elevated in nasal fluid of colonized children (Figure 3B). In  
275 addition, levels of nasal Tregs were not affected by colonization state and were lower in  
276 children than in young adults (Figure 4G).

277 A limitation of this cross-sectional observational study was that we focused on three  
278 groups: young children, young adults and older adults. Consequently, we have no older  
279 children from 6-17 years and we also have few adults between 30-50 years. This makes  
280 it hard to detect at which ages nasal immune profiles start shifting.

281 In conclusion, we observed severe and dynamic alterations in mucosal immunity with age,  
282 highlighting the need for measuring mucosal responses in target populations when  
283 investigating host-pathogen interactions and vaccine-induced immunity, especially in the  
284 young and elderly.

285

286

## 287 **Methods**

### 288 **Study design**

289 We recruited individuals between 1–80 years of age in a series of studies  
290 (ISRCTN85509051, ISRCTN10948363, ISRCTN16993271, ISRCTN68323432 and  
291 ISRCTN76456378). Some of the subjects in this manuscript (the young adults cohort)  
292 were originally described previously (40). For a subset of the young adults, cytokines and  
293 nasal cell data have been used in another manuscript deposited on a pre-print server (18),  
294 although the results do not overlap with those reported here. All adults were healthy and  
295 inclusion criteria common to all adult studies were: capacity to give informed consent,  
296 aged >18 years and speak fluent English. Children awaiting a procedure requiring general  
297 anaesthesia: dental extraction (44%), MRI (36%), orthopaedic surgery (14%) and plastic  
298 surgery (6%), were recruited. Inclusion criteria were: aged 1-5 years, capacity of a parent  
299 of the participant to give informed consent and speak fluent English. Exclusion criteria and  
300 sample collection details for adults and children are provided in an online data  
301 supplement.

### 302 **Ethics statement**

303 All adult volunteers and a parent of children involved in the study gave written informed  
304 consent and research was conducted in compliance with all relevant ethical regulations.  
305 Ethical approval was obtained from the East Liverpool NHS Research Ethics Committee,  
306 reference numbers: 17/NW/0663, 16/NW/0031, 17/NW/0029, 15/NW/0931 and  
307 14/NW/1460.

308

### 309 **Flow cytometry analysis**

310 All flow cytometry samples were acquired on a LSRII flow cytometer (BD) and analysed  
311 using Flowjo X (Treestar). Compensation matrices were set using compensation beads  
312 (BD Biosciences) and ArC™ Amine Reactive Compensation beads (ThermoFisher) and  
313 manually inspected for representative samples. All antibodies were titrated and  
314 fluorescence minus one controls were used to verify specificity of signal. Additional detail  
315 on immunophenotyping of nasal cells, neutrophil phenotyping and monocyte and  
316 neutrophil functional assays is provided in an online data supplement.

### 317 **Luminex analysis of nasal lining fluid**

318 Cytokines were eluted from stored Nasosorption™ filters using 100µL of Luminex assay  
319 buffer (ThermoFisher) by centrifugation, then the eluate was cleared by further  
320 centrifugation at 16,000 x G, as described previously (17, 19). Concentrations of 30  
321 cytokines were measured using the 30-plex magnetic human Luminex cytokine kit (all  
322 using lot ID 1805187A, ThermoFisher). Samples were measured on a LX200 (Luminex)  
323 and analysed with xPonent3.1 software (Luminex) following manufacturer's instructions.  
324 Samples were analysed in duplicates and analytes with a CV > 50% were excluded.

### 325 **Myeloperoxidase (MPO) ELISA of nasal lining fluid**

326 Levels of myeloperoxidase were determined using the Human Myeloperoxidase DuoSet  
327 ELISA Kit (R&D Systems) as per manufacturer's instructions. Plates were read on a  
328 FLUOstar® Omega machine (BMG Labtech) and data was analysed with Mars data  
329 analysis software version 3.1 following manufacturer's instructions. Samples were  
330 analysed in duplicates and samples with a CV > 20% were excluded.



331 **Statistical analysis**

332 Statistical analyses were performed using R software (version 3.5.1). Two-tailed statistical  
333 tests were used throughout the study. Mann-Whitney tests were used to compare groups  
334 and multiple correction testing (Benjamin-Hochberg) was applied for Luminex analysis.  
335 Correlations were assessed using Pearson's correlation test using either raw or log-  
336 transformed values. Differences were considered significant at  $p < 0.05$ .

337

338

339

340

341

342

343

344

345

346

347

348

349

350 **Acknowledgements**

351 This work was supported by Bill and Melinda Gates Foundation (OPP1117728 awarded  
352 to Daniela Ferreira), the Medical Research Council (MR/K01188X/1 awarded to S.G  
353 Gordon) and we acknowledge the support of the National Institute for Health Research  
354 Clinical Research Network. This work was also supported by the Liverpool School of  
355 Tropical Medicine Director Catalyst Fund which was funded by the Wellcome Trust  
356 Institutional Strategic Support Fund 3 (204806/Z/16/Z) and the Liverpool School of  
357 Tropical Medicine Internal Funding (awarded to Simon Jochems). Flow cytometry  
358 acquisition was performed on a BD LSR II cytometer and BD FacsAria III Cell Sorter  
359 funded by a Wellcome Trust Multi-User Equipment Grant (104936/Z/14/Z).

360 We would like to thank all volunteers for participating in this study and R. Robinson, C.  
361 Lowe, L. Lazarova, K. Piddock and I. Wheeler for clinical support. Unencapsulated  
362 *Streptococcus pneumoniae* was a gift by J. Brown. Daniela Ferreira and Simon Jochems  
363 are members of the Human Infection Challenge Network for Vaccine Development (HIC-  
364 Vac), which is funded by the Global Challenges Research Fund Networks in Vaccines  
365 Research and Development, which was co-funded by the Medical Research Council and  
366 Biotechnology and Biological Sciences Research Council.

367

## 368 References

- 369 1. Liu L, *et al.* (2016) Global, regional, and national causes of under-5 mortality in 2000-15: an  
370 updated systematic analysis with implications for the Sustainable Development Goals. *Lancet*  
371 388(10063):3027-3035.
- 372 2. Daniel P, Woodhead M, Welham S, McKeever TM, & Lim WS (2016) Mortality reduction in adult  
373 community-acquired pneumonia in the UK (2009-2014): results from the British Thoracic Society  
374 audit programme. *Thorax* 71(11):1061-1063.
- 375 3. Jain S, *et al.* (2015) Community-Acquired Pneumonia Requiring Hospitalization among U.S.  
376 Adults. *N Engl J Med* 373(5):415-427.
- 377 4. Wroe PC, *et al.* (2012) Aging population and future burden of pneumococcal pneumonia in the  
378 United States. *The Journal of infectious diseases* 205(10):1589-1592.
- 379 5. Carr EJ, *et al.* (2016) The cellular composition of the human immune system is shaped by age and  
380 cohabitation. *Nat Immunol* 17(4):461-468.
- 381 6. Sathaliyawala T, *et al.* (2013) Distribution and compartmentalization of human circulating and  
382 tissue-resident memory T cell subsets. *Immunity* 38(1):187-197.
- 383 7. Krone CL, van de Groep K, Trzcinski K, Sanders EA, & Bogaert D (2014) Immunosenescence and  
384 pneumococcal disease: an imbalance in host-pathogen interactions. *Lancet Respir Med* 2(2):141-  
385 153.
- 386 8. Bartlett DB, *et al.* (2012) The age-related increase in low-grade systemic inflammation  
387 (Inflammaging) is not driven by cytomegalovirus infection. *Aging Cell* 11(5):912-915.
- 388 9. Patin E, *et al.* (2018) Natural variation in the parameters of innate immune cells is preferentially  
389 driven by genetic factors. *Nat Immunol* 19(3):302-314.
- 390 10. Garcia-Prat M, *et al.* (2018) Extended immunophenotyping reference values in a healthy  
391 pediatric population. *Cytometry B Clin Cytom.*
- 392 11. Koga T, *et al.* (2000) Evidence for early aging in the mucosal immune system. *J Immunol*  
393 165(9):5352-5359.
- 394 12. Goldblatt D, *et al.* (2005) Antibody Responses to Nasopharyngeal Carriage of Streptococcus  
395 pneumoniae in Adults: A Longitudinal Household Study. *Journal of Infectious Diseases*  
396 192(3):387-393.
- 397 13. Ferreira DM, Jambo KC, & Gordon SB (2011) Experimental human pneumococcal carriage models  
398 for vaccine research. *Trends Microbiol* 19(9):464-470.
- 399 14. Cobey S & Lipsitch M (2012) Niche and neutral effects of acquired immunity permit coexistence  
400 of pneumococcal serotypes. *Science* 335(6074):1376-1380.
- 401 15. Lu YJ, *et al.* (2008) Interleukin-17A mediates acquired immunity to pneumococcal colonization.  
402 *PLoS Pathog* 4(9):e1000159.
- 403 16. Zhang Z, Clarke TB, & Weiser JN (2009) Cellular effectors mediating Th17-dependent clearance of  
404 pneumococcal colonization in mice. *J Clin Invest* 119(7):1899-1909.
- 405 17. Jochems SP, *et al.* (2018) Inflammation induced by influenza virus impairs human innate immune  
406 control of pneumococcus. *Nat Immunol* 19(12):1299-1308.
- 407 18. Nikolaou E, *et al.* (2018) Experimental Human Challenge Reveals Distinct Mechanisms of  
408 Acquisition or Protection Against Pneumococcal Colonization. *bioRxiv*:459495.
- 409 19. Jochems SP, *et al.* (2017) Novel Analysis of Immune Cells from Nasal Microbiopsy Demonstrates  
410 Reliable, Reproducible Data for Immune Populations, and Superior Cytokine Detection Compared  
411 to Nasal Wash. *PLoS One* 12(1):e0169805.
- 412 20. Thwaites RS, *et al.* (2018) Absorption of Nasal and Bronchial Fluids: Precision Sampling of the  
413 Human Respiratory Mucosa and Laboratory Processing of Samples. *J Vis Exp* (131).

- 414 21. Yoon J, Terada A, & Kita H (2007) CD66b regulates adhesion and activation of human eosinophils.  
415 *J Immunol* 179(12):8454-8462.
- 416 22. Morton B, *et al.* (2016) Augmented Passive Immunotherapy with P4 Peptide Improves Phagocyte  
417 Activity in Severe Sepsis. *Shock* 46(6):635-641.
- 418 23. Fortunati E, Kazemier KM, Grutters JC, Koenderman L, & Van den Bosch v J (2009) Human  
419 neutrophils switch to an activated phenotype after homing to the lung irrespective of  
420 inflammatory disease. *Clin Exp Immunol* 155(3):559-566.
- 421 24. Yatsunenkov T, *et al.* (2012) Human gut microbiome viewed across age and geography. *Nature*  
422 486(7402):222-227.
- 423 25. Segal AW (2005) How neutrophils kill microbes. *Annu Rev Immunol* 23:197-223.
- 424 26. Li Y, Karlin A, Loike JD, & Silverstein SC (2004) Determination of the critical concentration of  
425 neutrophils required to block bacterial growth in tissues. *J Exp Med* 200(5):613-622.
- 426 27. Uhl B, *et al.* (2016) Aged neutrophils contribute to the first line of defense in the acute  
427 inflammatory response. *Blood* 128(19):2327-2337.
- 428 28. Pignatti P, *et al.* (2005) Downmodulation of CXCL8/IL-8 receptors on neutrophils after  
429 recruitment in the airways. *J Allergy Clin Immunol* 115(1):88-94.
- 430 29. Verschoor CP, *et al.* (2015) Circulating TNF and mitochondrial DNA are major determinants of  
431 neutrophil phenotype in the advanced-age, frail elderly. *Mol Immunol* 65(1):148-156.
- 432 30. Butcher S, Chahel H, & Lord JM (2000) Review article: ageing and the neutrophil: no appetite for  
433 killing? *Immunology* 100(4):411-416.
- 434 31. Wensch C, Patruta S, Daxbock F, Krause R, & Horl W (2000) Effect of age on human neutrophil  
435 function. *J Leukoc Biol* 67(1):40-45.
- 436 32. Mueller SN & Mackay LK (2016) Tissue-resident memory T cells: local specialists in immune  
437 defence. *Nat Rev Immunol* 16(2):79-89.
- 438 33. Weinberger B, Herndler-Brandstetter D, Schwanninger A, Weiskopf D, & Grubeck-Loebenstien B  
439 (2008) Biology of immune responses to vaccines in elderly persons. *Clin Infect Dis* 46(7):1078-  
440 1084.
- 441 34. Zafar MA, Wang Y, Hamaguchi S, & Weiser JN (2017) Host-to-Host Transmission of Streptococcus  
442 pneumoniae Is Driven by Its Inflammatory Toxin, Pneumolysin. *Cell Host Microbe* 21(1):73-83.
- 443 35. Davis KM, Nakamura S, & Weiser JN (2011) Nod2 sensing of lysozyme-digested peptidoglycan  
444 promotes macrophage recruitment and clearance of *S. pneumoniae* colonization in mice. *J Clin*  
445 *Invest* 121(9):3666-3676.
- 446 36. Siegel SJ, Tamashiro E, & Weiser JN (2015) Clearance of Pneumococcal Colonization in Infants Is  
447 Delayed through Altered Macrophage Trafficking. *PLoS Pathog* 11(6):e1005004.
- 448 37. Morris MC & Pichichero ME (2017) Streptococcus pneumoniae burden and nasopharyngeal  
449 inflammation during acute otitis media. *Innate Immun* 23(8):667-677.
- 450 38. Zhang Q, *et al.* (2011) Characterisation of regulatory T cells in nasal associated lymphoid tissue in  
451 children: relationships with pneumococcal colonization. *PLoS Pathog* 7(8):e1002175.
- 452 39. Mubarak A, *et al.* (2016) A dynamic relationship between mucosal T helper type 17 and  
453 regulatory T-cell populations in nasopharynx evolves with age and associates with the clearance  
454 of pneumococcal carriage in humans. *Clin Microbiol Infect* 22(8):736 e731-737.
- 455 40. Rylance J, *et al.* (2019) Two Randomized Trials of Effect of Live Attenuated Influenza Vaccine on  
456 Pneumococcal Colonization. *American journal of respiratory and critical care medicine*.

457

458

459 **Tables**

460 **Table 1. Cohort characteristics.**

|                                      | <b>Children</b> | <b>Young adults</b> | <b>Older adults</b> |
|--------------------------------------|-----------------|---------------------|---------------------|
| <b>Nasal phenotyping sample size</b> | 43              | 121                 | 43                  |
| <b>Age in median years (range)</b>   | 3 (1-5)         | 20 (18-49)          | 63 (50-80)          |
| <b>Number of females (%)</b>         | 18 (41.2%)      | 64 (52.9%)          | 26 (60.5)           |
| <b>Number of Spn colonized (%)</b>   | 19 (45.2%*)     | 9 (7.4%)            | 2 (4.7%)            |

461

462 \*Streptococcus pneumoniae (Spn) colonization was assessed by classical microbiology.

463 For one child no nasopharyngeal swab was collected and colonization was not assessed.

464

465

466

467

468

469

470

471

472

473

474 **Figure legends**

475 **Figure 1. Nasal immune cell populations change drastically with age.** A) Multi-  
476 dimensional scaling plot based on Euclidian distance, considering immune composition  
477 (granulocytes, monocytes and CD4<sup>+</sup> T, CD8<sup>+</sup> T and double-negative (DN) T cells as  
478 percentage of immune cells) and activation (HLA-DR<sup>+</sup> and CD66b<sup>Hi</sup> as percentage of T  
479 cells and neutrophils, respectively). Individual children (red circles, n=42), young adults  
480 (green triangles, n=86) and older adults (blue squares, n=36) are shown along with 50%  
481 confidence intervals. R and p values represent analysis of similarity results and stress  
482 depicts Kruskal stress. Violin plots with boxplots showing levels of B) granulocytes and C)  
483 T cells normalized to epithelial cells for children (n=43), young adults (n=118) and older  
484 adults (n=46). \*\*\*\*p=1.4 x 10<sup>-6</sup> and p=7.2 x 10<sup>-5</sup> by Mann-Whitney test comparing  
485 granulocytes in children with young adults and older adults, respectively. \*\*\*p=0.0006 by  
486 Mann-Whitney test comparing T cell levels between children and young adults. \*\*\*\*p=4.5  
487 x 10<sup>-14</sup> and p=2.4 x 10<sup>-11</sup> comparing T cell levels in older adults with those in children and  
488 with young adults, respectively. Scatterplots showing percentage of D) granulocytes and  
489 E) T cells among nasal immune cells. Individual subjects are depicted, a grey vertical  
490 dashed line shows the cut-off between young and older adults at age 50 and a locally  
491 estimated scatterplot smoothing (loess) curve with 95% confidence interval is plotted. F)  
492 Violin plots with boxplots showing levels of monocytes normalized to epithelial cells. G)  
493 Pie charts showing the mean levels of T cell subsets (CD4<sup>+</sup>, CD8<sup>+</sup>, double-negative (DN)  
494 and double-positive (DP) per age group (children, n=43; young adults, n=109; older  
495 adults, n=42). H) Violin plots with boxplots showing levels of CD66b<sup>Hi</sup> granulocytes for  
496 children (n=43), young adults (n=121) and older adults (n=41). \*\*\*\*p=2.3 x 10<sup>-6</sup> and

497 \*\*\* $p=0.0004$  by Mann-Whitney test comparing children with young adults and older adults,  
498 respectively. I) Violin plots with boxplots showing levels of HLA-DR<sup>+</sup> T cells for children  
499 (n=43), young adults (n=109) and older adults (n=38). \*\* $p=0.001$  and \*\*\* $p=0.0002$   
500 comparing young adults with children and older adults by Mann-Whitney test, respectively.

501 **Figure 2. Changes in innate immune function with age.** A) Scatterplots showing  
502 percentage of monocytes that are producing CCL2, IL-10, IL-6 or TNF following a two-  
503 hour stimulation with heat-killed *Streptococcus pneumoniae*. Individual children (red  
504 circles, n=23), young adults (green triangles, n=13) and older adults (blue squares, n=7)  
505 are depicted. Black line and shaded area depict linear regression fit and 95% confidence  
506 intervals. R and p represent rho and p-value from Pearson's correlation test, respectively.  
507 B) Neutrophil oxidation capacity was assessed using a phagocytic bead assay at 4  
508 timepoints, including a positive control where LPS was added for 45 minutes. Median and  
509 interquartile range are shown for children (red circles, n=11), young adults (green  
510 triangles, n=6) and older adults (blue squares, n=5). \* $p<0.05$ , \*\* $p<0.01$ , \*\*\* $p<0.001$  by  
511 Mann-Whitney test comparing two groups. C) Correlation matrix for oxidative capacity and  
512 log-transformed blood neutrophil surface marker expression using Pearson correlation  
513 test (n=21). Circle colour and size represent rho and absolute rho value, respectively.  
514 \* $p<0.05$ , \*\* $p<0.01$  by Pearson correlation test D) Mean fluorescent intensity (MFI) of  
515 surface markers on blood neutrophils per age group. Median and interquartile range are  
516 shown for children (red circles, n=13), young adults (green triangles, n=8) and older adults  
517 (blue squares, n=5). \* $p<0.05$ , \*\*\* $p<0.001$  by Mann-Whitney test. E) Comparison of marker  
518 expression on neutrophils from blood (red) and nose (blue) for paired volunteers (n=11  
519 children and 2 young adults). F) Correlation matrix for log-transformed marker expression

520 on blood and nasal neutrophils using Pearson correlation test (n=13). Circle colour and  
521 size represent rho and absolute rho value, respectively. \*p=0.018, \*\*\*\*p=1.1x10<sup>-5</sup> by  
522 Pearson correlation test.

523 **Figure 3. Nasal cytokine responses to pneumococcal colonization.** A) Multi-  
524 dimensional scaling plot based on Euclidian distance, considering log-transformed  
525 concentrations of 30 nasal cytokines. Individual Spn not-colonized children (Spn<sup>-</sup> purple  
526 circles, n=17), Spn colonized children (Spn<sup>+</sup> red triangles, n=14) and young adults (green  
527 squares, n=26) are shown along 50% confidence intervals. R and p values represent  
528 analysis of similarity results and stress depicts Kruskal stress. B) Median and interquartile  
529 range of the concentrations for each of the 30 cytokines are shown for not-colonized  
530 children (purple, n=27), colonized children (red, n=22) and young adults (n=37). \*p<0.05,  
531 \*\*p<0.01, \*\*\*p<0.001, \*\*\*\*p<0.0001 by Mann-Whitney test compared to young adults,  
532 followed by Benjamini-Hochberg correction for multiple testing, with colour indicating  
533 significantly altered group. C) Volcano plot showing Pearson correlation results between  
534 log-transformed pneumococcal load for colonized children with log-transformed cytokine  
535 concentration, not corrected for multiple testing. Significantly correlating cytokines are  
536 depicted in red. D) Violin plots with boxplots showing concentration of myeloperoxidase  
537 (MPO) for not-colonized children (purple, n=27), colonized children (red, n=22) and young  
538 adults (green, n=36). \*p=0.022, \*\*\*p=0.0005 by Mann-Whitney test. Scatterplots show  
539 correlation between log-transformed concentration of nasal MPO with E) log-transformed  
540 pneumococcal load, F) percentage of CD66b<sup>Hi</sup> granulocytes and g) log-transformed levels  
541 of nasal granulocytes (normalized to epithelial cells). Individuals are shown, and line and



542 shaded area represent linear regression and 95% confidence interval, respectively. R  
543 (Pearson rho) and p (p-value) are shown for each correlation.

544 **Figure 4. Nasal immune cell populations are not affected by Spn colonization in**  
545 **children.** A) Multi-dimensional scaling plot based on Euclidian distance, considering  
546 immune composition (granulocytes, monocytes and CD4<sup>+</sup> T, CD8<sup>+</sup> T and double-negative  
547 (DN) T cells as percentage of immune cells) and activation (HLA-DR<sup>+</sup> and CD66b<sup>Hi</sup> as  
548 percentage of T cells and neutrophils, respectively). Individual non-colonized children  
549 (Spn<sup>-</sup> purple circles, n=23) and colonized children (Spn<sup>+</sup>, red triangles, n=19) are shown  
550 along with 50% confidence intervals. R represents the analysis of similarity results and  
551 stress depicts Kruskal stress. Violin plots with boxplots showing numbers of B)  
552 granulocytes, C) T cells or D) monocytes normalized to epithelial cells for non-colonized  
553 children (Spn<sup>-</sup>, purple, n=23) and colonized children (Spn<sup>+</sup>, red, n=19). Violin plots with  
554 boxplots showing levels of E) CD66b<sup>Hi</sup> granulocytes or F) HLA-DR<sup>+</sup> T cells. \*\*p=0.005 by  
555 Mann-Whitney test. G) Violin plots with boxplots showing numbers of regulatory T cells  
556 (Tregs) for non-colonized children (Spn<sup>-</sup>, purple, n=23), colonized children (Spn<sup>+</sup>, red,  
557 n=19) and non-colonized young adults (green, n=11). \*p=0.036, \*\*p=0.0098 comparing  
558 young adults with colonized and non-colonized children by Mann-Whitney test,  
559 respectively.

560

561

562

563

564 **Figures**

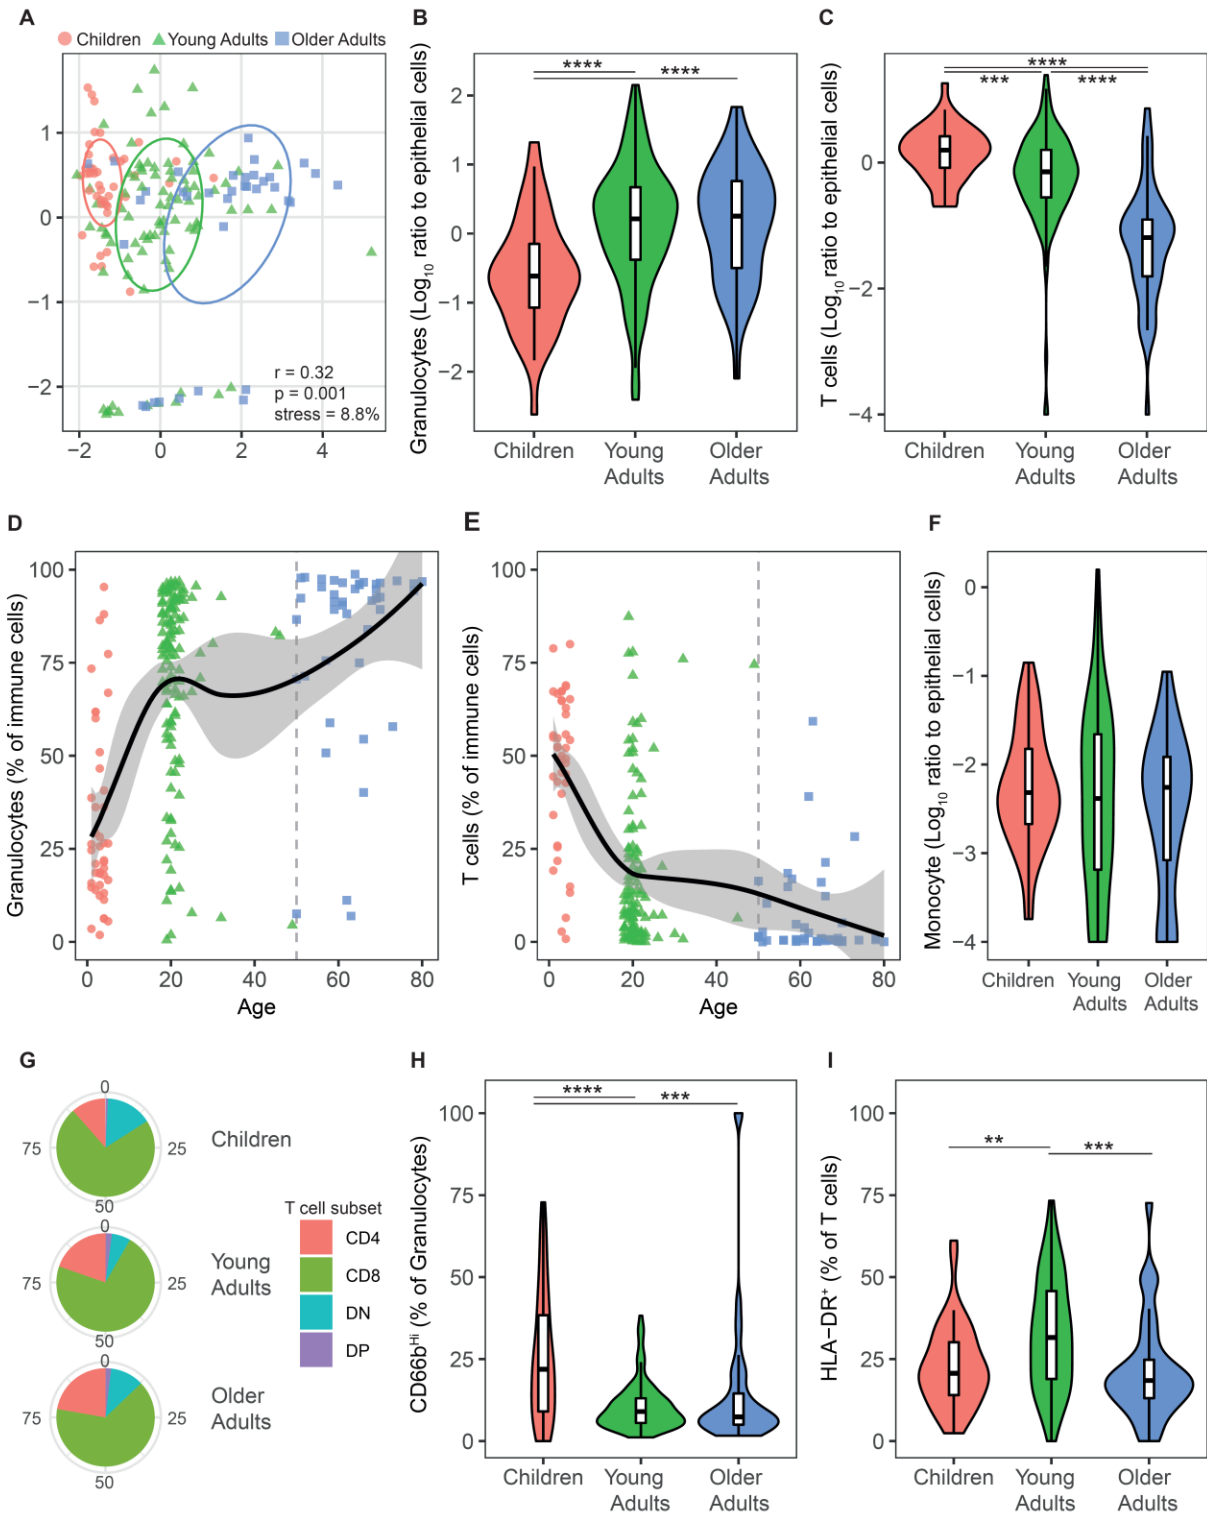

565

566 **Figure 1.**

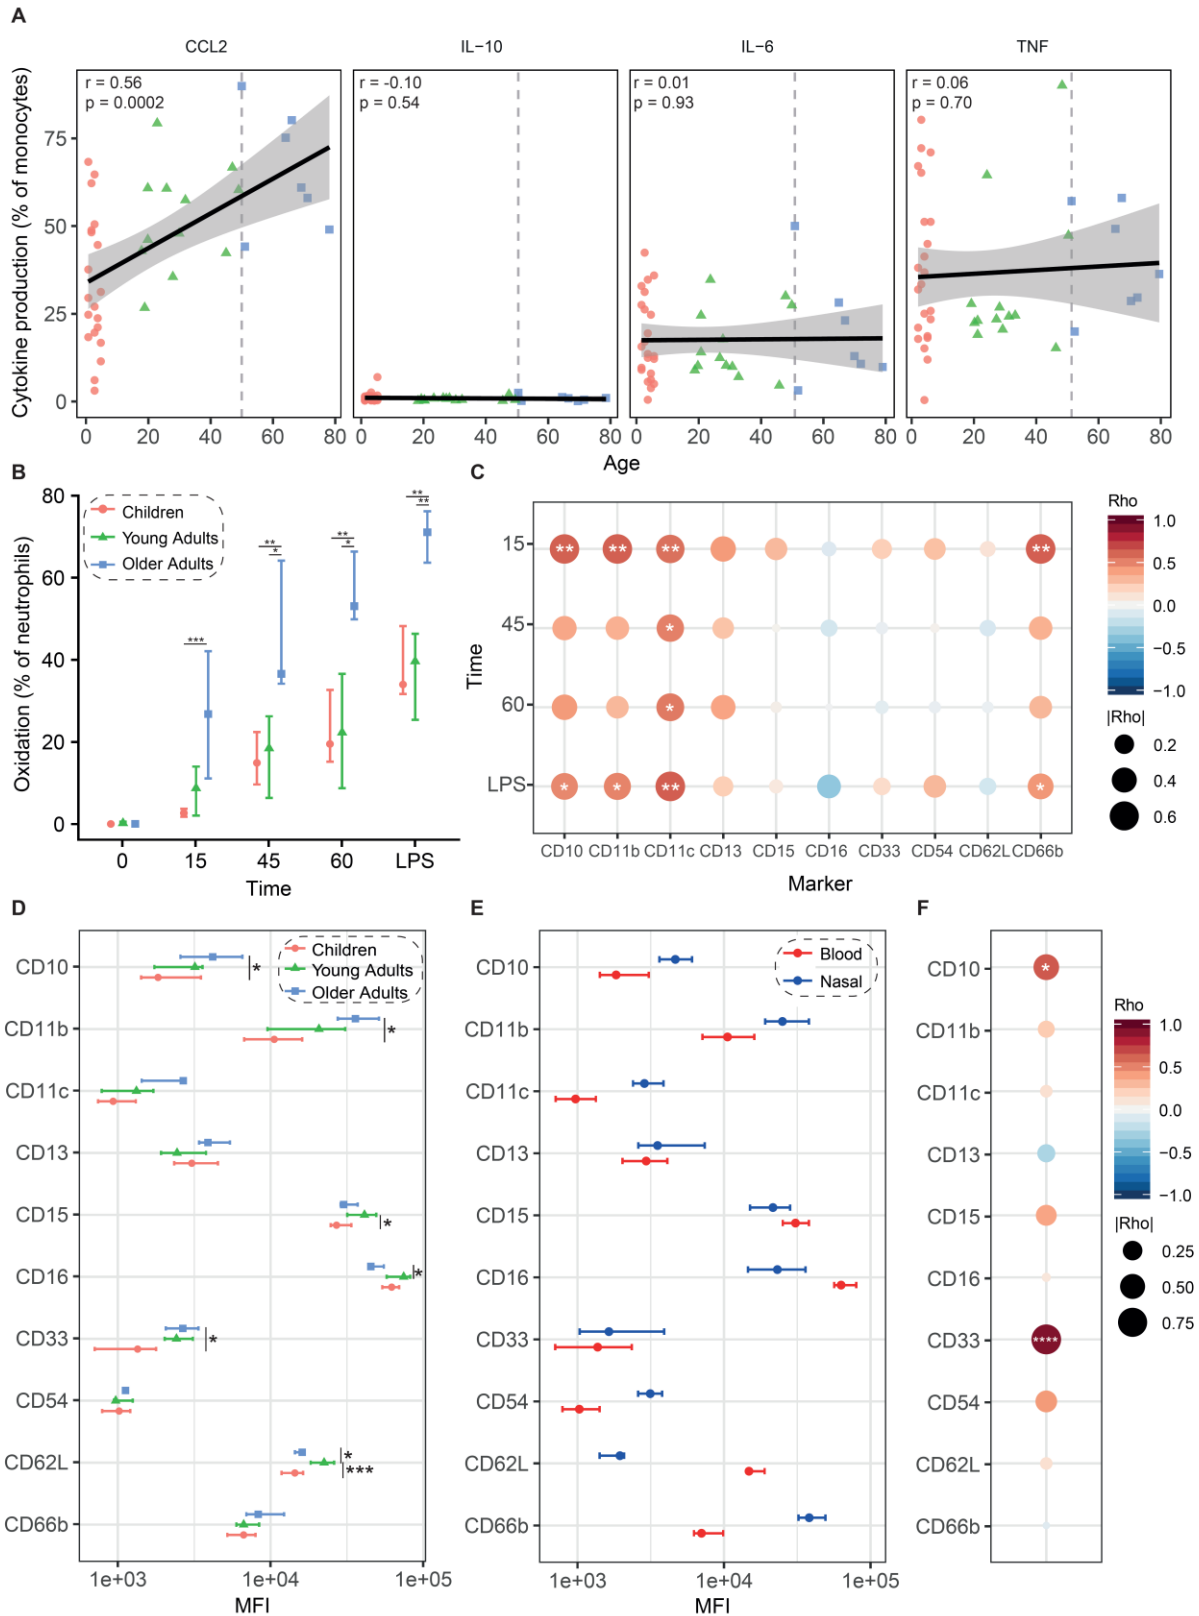

567

568 Figure 2.

569

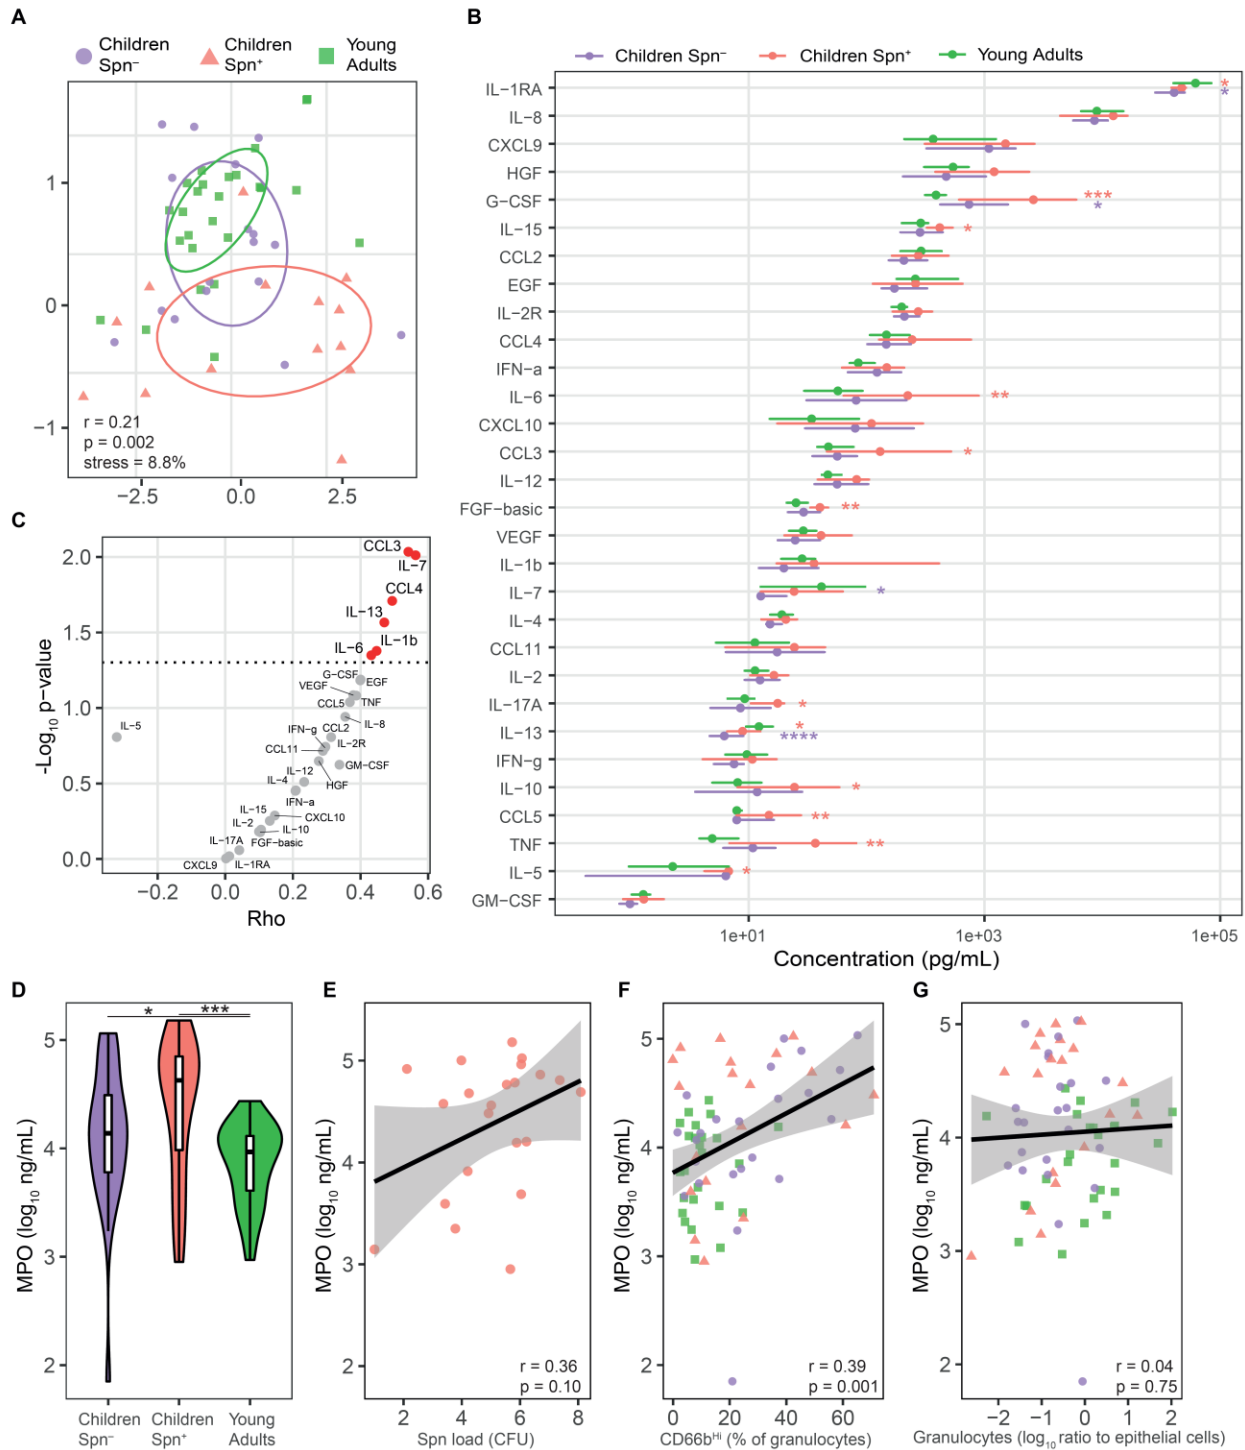

570

571 Figure 3.

572

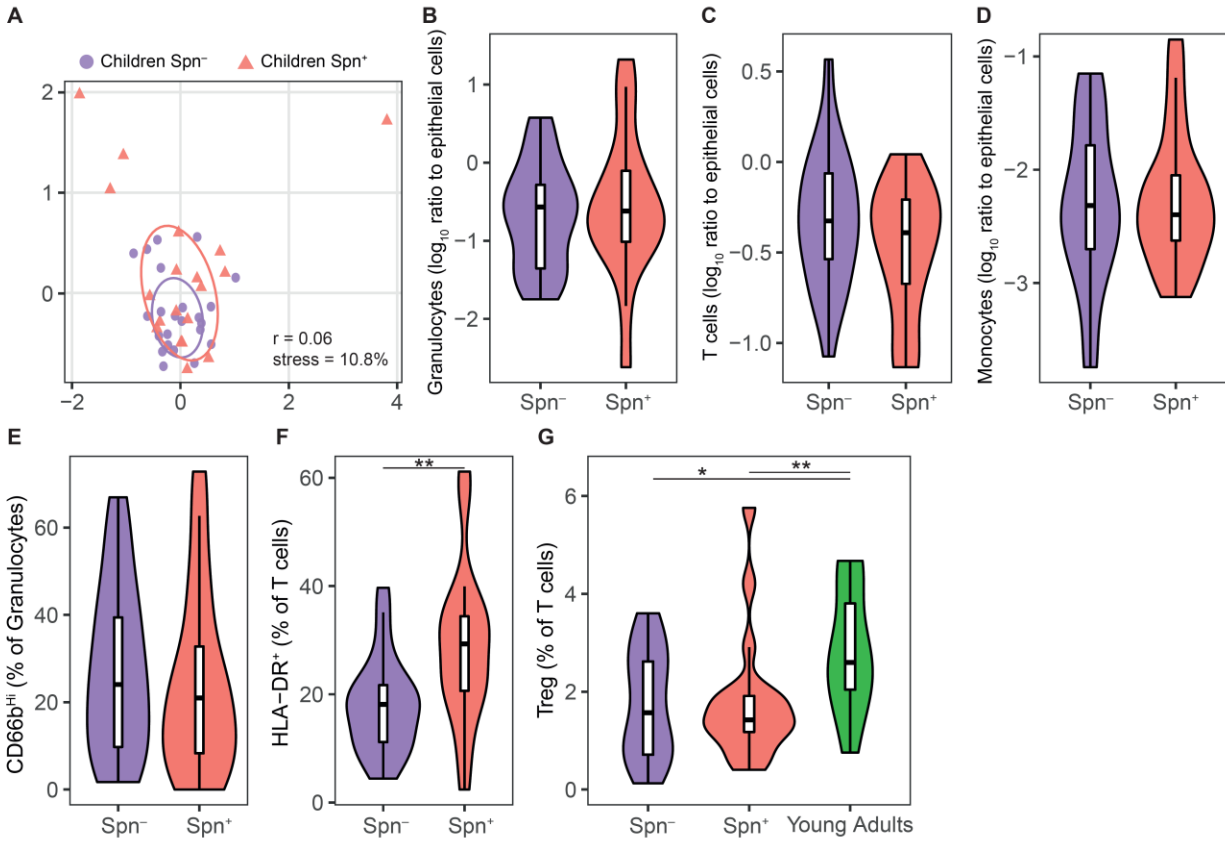

573

574 Figure 4.

575

576

577

578

579

580

581
